# Supplementary material
Source: MDPI journal article supplement (https://www.mdpi.com/2075-163X/10/8/698)
Supplement: s1 [file s1]

## Sheet: Table S1 analytical methods
Method	Abbreviation	Elements analyzed
Pressed Pellet X-Ray Fluorescence	PPXRF	Ga, Pb, Sn, Nb, Rb
Instrument Neutron Activation Analysis	INAA	Au, As, Br, Cl, Co, Cr, Hg, Ir, Sb, Sc, Se, W, Y
Fusion Mass Spectrometry	FUS-MS	Bi, Cs, Ga, Ge, Hf, In, Mo, Nb, Rb, Sn, Ta, Th, U, Zr, REE,
Fusion Inductively Coupled Plasma	FUS-ICP	SiO2, Al2O3, Fe2O3, MgO, CaO, Na2O, K2O, P2O5, MnO, TiO2, Sr, V, Y
Total Digestion Inductively Coupled Plasma	TD-ICP	Ag, Cd, Cu, Ni, Pb, S, Zn
Infrared	IR	Total C, Total S, CO2
Titration	TITR	FeO
Gravimetric	GRAV	H2O+, H2O-

## Sheet: Table S2 Whole-rock Chem Comp
Table 2. Whole-rock chemical compositions of selected samples from the Busang prospect
Sample:	BSSE-1B	BSSE-2C	BSSE-295B	BSSE-333A	BSSE-333B	BSSE-295A	BSSE-333C	BSSE-333D
Depth:	309.50 m	329.00 m	368.00 m	154.00 m	272.00 m	235.75 m	286.00 m	308.00 m
Sample Type:	Host Rock	Host Rock	Host rock	Host rock	Host rock	Vein	Vein	Vein
Analyte	Major Elements (Wt. %)
SiO2	52.91	60.86	63.75	57.8	55.97	57.36	80.87	68.61
Al2O3	16.99	17.07	14.24	14.3	17.3	13.3	8.21	14.41
FeO	2.7	3.5	3	2.9	4.1	4.5	0.4	3.5
Fe2O3	1.12	2.72	1.28	3.67	2.31	1.98	2.1	0.9
MnO	0.133	0.054	0.111	0.291	0.377	0.193	0.393	0.163
MgO	1.02	0.44	0.63	2.33	3.04	3.4	0.52	0.86
CaO	7.4	1.38	4.77	3.42	6.27	3.92	0.84	0.68
Na2O	0.31	0.13	0.42	0.13	2.49	0.34	0.11	0.17
K2O	1.57	2.02	1.39	3.93	0.42	1.99	2.15	3.86
TiO2	0.622	0.603	0.318	0.484	0.625	0.46	0.185	0.343
P2O5	0.13	0.14	0.1	0.11	0.12	0.08	0.04	0.09
LOI	13.93	9.35	10.27	9.44	6.23	10.68	3.71	5.47
Total	98.83	98.28	100.3	98.8	99.26	98.19	99.54	99.05
Total C	1.83	0.29	1.1	1.27	0.55	1.5	0.27	0.2
Total S	2.53	4.78	3.17	5.09	2.12	4.6	1.53	3.03
Cl	0.01	0.02	0.01	< 0.01	< 0.01	0.03	< 0.01	0.01
CO2	6.52	0.96	3.95	4.49	1.94	5.37	0.97	0.71
H2O+	4.9	4.5	3.5	2.1	2.5	1.2	1.3	2
H2O-	1.4	0.8	1	0.6	0.7	0.4	0.5	0.6
Trace Elements (ppm)
V	160	123	67	119	145	124	32	96
Sc	14.7	13.3	7.9	11.7	14.1	12.6	3.57	11.6
Ga	16	15	13	13	15	25	7	14
Ge	1.9	3.6	0.9	< 0.5	0.8	2.8	1.3	< 0.5
Rb	51	61	52	144	10	56	74	123
Sr	94	37	101	51	262	63	24	30
Cr	11	16.2	19.2	10.7	9.9	28.4	12.6	28.9
Zr	87	114	80	85	83	65	65	84
Hf	2.2	3	2	2.2	2.4	1.8	1.5	2.1
Nb	3.3	3.8	2.6	3.1	2.7	2.6	6.8	2.3
Ta	0.2	0.24	0.15	0.19	0.2	0.14	0.11	0.15
Co	12.3	18.1	9.3	16.2	14.8	15	5.7	8.3
Ni	8	9	10	4	6	11	13	8
Cu	25	13	1140	15	69	17	122	211
Zn	29	8	98	215	112	35	41	59
Pb	39	< 5	9	55	27	157	1420	285
Sb	4.1	2.9	1.3	6	4.2	9	117	81.5
As	16	24	75	33	24	185	70	77
Bi	0.1	0.4	< 0.1	0.4	0.1	2.1	0.5	1.6
Tl	0.41	0.61	0.74	2.04	0.38	0.66	1.08	1.8
Mo	< 2	< 2	19	2	< 2	2	6	< 2
Se	< 0.5	< 0.5	14.6	10.2	< 0.5	5.4	17.4	4.9
Ag	< 0.5	< 0.5	0.9	< 0.5	< 0.5	2.4	1.6	6.8
Au (ppb)	14	8	139	20	14	74	32	47
Sn	3	3	1	2	< 1	2	< 1	3
Cs	9.7	5.8	8.7	9.4	6.8	2.8	4.6	6.7
Ba	100	160	145	380	182	228	185	467
Th	3.47	4.54	2.63	4.17	3.07	2.73	1.46	2.8
U	0.85	1.07	0.65	0.94	0.73	1.04	0.41	0.74
Y	16	15	9	12	13	15	4	6
La	9.24	9.29	7.47	10.2	8.22	4.41	2.73	4.14
Ce	19.9	19.5	14.7	20.1	18.1	10.4	4.77	8.41
Pr	2.41	2.28	1.55	2.25	2.21	1.27	0.59	0.95
Nd	10.3	8.91	5.93	8.68	9.36	5.44	2.3	3.56
Sm	2.41	2.18	1.29	1.82	2.11	1.32	0.61	0.81
Eu	0.685	0.704	0.55	0.588	0.725	0.261	0.193	0.208
Gd	2.69	2.43	1.31	2.02	2.13	1.73	0.61	0.97
Tb	0.44	0.44	0.22	0.33	0.38	0.35	0.11	0.17
Dy	2.7	2.76	1.33	2.01	2.41	2.37	0.71	1.04
Ho	0.57	0.59	0.28	0.42	0.5	0.53	0.15	0.22
Er	1.78	1.77	0.84	1.26	1.54	1.62	0.5	0.68
Tm	0.272	0.266	0.125	0.187	0.231	0.239	0.076	0.11
Yb	1.83	1.75	0.85	1.24	1.58	1.6	0.53	0.78
Lu	0.3	0.29	0.141	0.207	0.284	0.258	0.089	0.138

## Sheet: Table S3 min-chem
Point No.	Mineral	Fe (wt.%)	Cu (wt.%)	Zn (wt.%)	As (wt.%)	Sb (wt.%)	Pb (wt.%)	S (wt.%)	Se (wt.%)	Ag (ppm)	Cd (wt.%)	Te (wt.%)	Au (ppm)	Hg (wt.%)	Bi (wt.%)	Total (wt.%)
3	Bournonite	0	13.068	0.014	5.054	16.351	43.778	19.944	0	<dl	0.104	0	<dl	0	0	98.313
4	Bournonite	0.008	13.787	0	8.456	12.103	44.982	20.354	0	<dl	0.092	0	<dl	0	0	99.782
5	Bournonite	0	13.613	0	4.824	17.267	43.257	20.01	0	<dl	0	0	630	0	0	99.034
14	Bournonite	0	13.554	0	4.864	17.479	45.192	19.603	0	<dl	0	0	<dl	0	0	100.692
15	Bournonite	0	12.056	0	3.54	21.704	40.605	19.257	0	<dl	0	0	<dl	0.066	0	97.228
1	Galena	0.008	0	0.027	0	0.053	85.136	12.888	0	<dl	0.119	0.13	<dl	0	0	98.361
2	Galena	0	0.067	0	0.006	0.145	85.934	13.242	0.03	<dl	0.069	0.073	<dl	0.003	0	99.569
6	Galena	0	0	0.026	0	0	87.157	12.966	0.055	<dl	0.389	0.034	<dl	0.116	0	100.743
7	Galena	0.004	0	0.009	0	0.01	88.345	13.126	0.032	<dl	0.186	0.05	<dl	0.014	0	101.776
8	Galena	0.023	0.036	0	0	0.07	87.565	12.971	0.05	<dl	0.318	0.017	<dl	0.07	0	101.12
13	Galena	0.004	0.029	0.065	0	0.026	86.543	13.091	0.048	190	0.236	0.071	<dl	0	0	100.132
10	Sphalerite	0.397	0.226	62.19	0	0.093	0.271	32.541	0	130	0.435	0.034	580	0	0	96.258
11	Sphalerite	0.401	2.139	59.711	0.417	1.169	0	31.946	0	1550	0.311	0	580	0.017	0.031	96.355
12	Sphalerite	0.358	0.02	62.559	0	0	0.02	32.343	0	2490	0.297	0.177	590	0	0	96.082
9	Tetrahedrite-tennantite	1.235	35.382	8.735	6.101	20.023	0.095	25.156	0	25940	0	0	160	0	0	99.337
21	Un-identified Fe-As-Cu-S mineral	25.517	21.416	0.044	7.959	0.018	0.21	43.281	0	180	0	0.009	850	0	0.008	98.565
<dl = Below detection limit

## Sheet: Table S4 FI data
Sample	Host	FIA	Tmice (oC)	NaCl (Wt % equivalent)	Th (oC)	Origin	V:L ratio	Length (µm)	Morphology
BSSE-1A	quartz	1	-1.6	2.73713	280.7	Unknown	0.2	15	Prismatic, equant
BSSE-333D	quartz	2	-0.8	1.396	330.4	Primary	0.15	7	Prismatic, elongate
BSSE-333D	quartz	2	-0.5	0.87902	230.5	Primary	0.15	5	Rounded, elongate
BSSE-333D	quartz	2	-0.8	1.396	313.9	Primary	0.15	10	Rounded, elongate
BSSE-333D	quartz	2	-0.6	1.05221	286.8	Primary	0.15	12	Rounded, elongate
Assemblage Mean			-0.675	1.18081	290.4		0.15	8.5
BSSE-333D	quartz	3	-0.8	1.396	239.1	Primary	0.15	20	Rounded, elongate
BSSE-333D	quartz	3	-0.8	1.396	231.4	Primary	0.15	12	Irregular, equant
BSSE-333D	quartz	3	-0.3	0.530037	240.5	Primary	0.15	25	Rounded, elongate
Assemblage Mean			-0.633333	1.10735	237		0.15	19
BSSE-333D	quartz	4	-0.8	1.396	197.5	Unknown	0.2	5	Rounded, elongate
BSSE-333D	quartz	5	-0.7	1.22453	263.6	Unknown	0.15	4	Rounded, elongate
BSSE-1A	quartz	6	-1.6	2.73713	251.4	Unknown	0.15	10	Rounded, elongate
BSSE-1A	quartz	6	-1.6	2.73713	258.8	Unknown	0.15	4	Rounded, elongate
BSSE-1A	quartz	6	-1.5	2.57243	245.9	Unknown	0.15	4	Rounded, elongate
BSSE-1A	quartz	6	-1.5	2.57243	245.9	Unknown	0.15	4	Rounded, elongate
Assemblage Mean			-1.55	2.65478	250.5		0.15	5.5
BSSE-1A	quartz	7	-1.2	2.07331	295.3	Unknown	0.15	10	Rounded, elongate
BSSE-1A	quartz	7	-1.1	1.90526	289.7	Unknown	0.15	6	Rounded, equant
Assemblage Mean			-1.15	1.98929	292.5		0.15	8
BSSE-333D	quartz	8	-1.5	2.57243	275.8	Unknown	0.15	13	Prismatic, equant
BSSE-333D	quartz	9	-1.1	1.90526	189.9	Unknown	0.15	20	Prismatic, elongate
BSSE-333D		10	-1.1	1.90526	244.1	Unknown	0.15	12	Rounded, elongate
BSSE-333D	quartz	11	-1	1.73636	276.6	Unknown	0.15	10	Rounded, equant
BSSE-333D	quartz	11	-0.5	0.87902	284.2	Unknown	0.15	7	Irregular, equant
BSSE-333D	quartz	11	-0.4	0.704964	280.2	Unknown	0.15	5	Irregular, equant
Assemblage Mean			-0.633333	1.10678	280.333		0.15	7.33333
BSSE-333D	quartz	12	-1.5	2.57243	256.7	Unknown	0.15	4	Rounded, elongate
BSSE-333D	quartz	13	-2.7	4.49475	222.3	Unknown	0.2	17	Irregular, equant
BSSE-333D	quartz	14	-1.7	2.901	214.3	Unknown	0.15	20	Rounded, elongate
BSSE-333D	quartz	15	-0.8	1.396	269.7	Unknown	0.1	20	Very irregular, equant
BSSE-333D	quartz	16	-3.2	5.26164	251.3	Unknown	0.1	10	Irregular, elongate
BSSE-333D	quartz	17	-0.7	1.22453	317.9	Unknown	0.15	7	Rounded, elongate
BSSE-333D	quartz	18			219	Unknown	0.15	8	Very irregular, elongate
BSSE-333D	quartz	18	-2.8	4.6497	229.2	Unknown	0.15	8	Very irregular, elongate
BSSE-333D	quartz	18	-3.3	5.41268	225.3	Unknown	0.15	15	Very irregular, elongate
Assemblage Mean			-3.05	5.03119	224.5		0.15	10.3333
BSSE-333D	quartz	19	-4.9	7.72629	212.7	Secondary	0.1	5	Irregular, equant
BSSE-333D	quartz	19	-4.9	7.72629	204.5	Secondary	0.1	4	Rounded, equant
BSSE-333D	quartz	19			237	Secondary	0.1	4	Prismatic, equant
BSSE-333D	quartz	19	-7	10.4853	244.7	Secondary	0.1	8	Irregular, elongate
BSSE-333D	quartz	19			242	Secondary	0.1	4	Irregular, equant
BSSE-333D	quartz	19			251.6	Secondary	0.1	8	Irregular, elongate
BSSE-333D	quartz	19			245.3	Secondary	0.1	4	Irregular, equant
Assemblage Mean			-5.6	8.64594	233.971		0.1	5.28571
BSSE-333D	quartz	20	-3.3	5.41268	366.2	Unknown	0.1	2	Rounded, equant
BSSE-333D	quartz	21	-3	4.95724	353.4	Unknown	0.15	4	Irregular, equant
BSSE-333D	quartz	22	-3.5	5.71243	303.2	Unknown	0.2	8	Irregular, elongate
BSSE-333D	quartz	23	-3.5	5.71243	301.2	Unknown	0.2	6	Prismatic, equant
BSSE-333D	quartz	23	-3.5	5.71243	316.3	Unknown	0.2	3	Prismatic, equant
BSSE-333D	quartz	23	-3.5	5.71243	314	Unknown	0.2	4	Prismatic, equant
BSSE-333D	quartz	23			314.1	Unknown	0.2	4	Prismatic, elongate
Assemblage Mean			-3.5	5.71243	311.4		0.2	4.25
BSSE-333D	quartz	24	-3.6	5.86116	272	Unknown	0.15	5	Irregular, elongate
BSSE-1B	quartz	25	-1.7	2.901	168	Primary	0.1	5	Irregular, elongate
BSSE-1B	quartz	25	-1.7	2.901	297.9	Primary	0.1	6	Rounded, equant
BSSE-1B	quartz	25	-1.7	2.901	284.4	Primary	0.1	3	Prismatic, equant
Assemblage Mean			-1.7	2.901	250.1		0.1	4.66667
BSSE-1B	quartz	26	-1.8	3.06404	179	Unknown	0.1	4	Irregular, equant
BSSE-333B	carbonate	27	-2.1	3.54824	316.5	Unknown	0.1	3	Rounded, equant
BSSE-333B	carbonate	28	-3.9	6.30276	270.5	Unknown	0.1	4	Prismatic, elongate
BSSE-333B	carbonate	28	-3.9	6.30276	283.5	Unknown	0.1	6	Prismatic, equant
Assemblage Mean			-3.9	6.30276	277		0.1	5
BSSE-333B	carbonate	29	-0.7	1.22453	334	Unknown	0.2	4	Prismatic, equant
BSSE-333B	carbonate	30	-0.6	1.05221	254.4	Secondary	0.1	3	Rounded, equant
BSSE-333B	carbonate	31	-0.6	1.05221	234.8	Unknown	0.1	3	Rounded, equant
BSSE-333B	carbonate	31	-0.8	1.396	276.4	Unknown	0.1	3	Rounded, equant
BSSE-333B	carbonate	31	-0.5	0.87902	283	Unknown	0.1	5	Irregular, equant
Assemblage Mean			-0.633333	1.10908	264.733		0.1	3.66667
BSSE-333B 12	carbonate	32	-1.1	1.90526	343.1	Unknown	0.1	3	Rounded, equant
BSSE-333B	carbonate	33	-8.3	12.0475	335	Unknown	0.2	8	Prismatic, equant
BSSE-333B	carbonate	33	-8.3	12.0475	335.3	Unknown	0.2	6	Prismatic, equant
BSSE-333B	carbonate	33	-7.6	11.2195	337.5	Unknown	0.2	6	Rounded, equant
BSSE-333B	carbonate	33	-8.3	12.0475	332.7	Unknown	0.2	3	Prismatic, equant
BSSE-333B	carbonate	33	-7.3	10.8553	335	Unknown	0.2	6	Prismatic, equant
Assemblage Mean			-7.96	11.6435	335.1		0.2	5.8
BSSE-333D	quartz	34	-2.6	4.339	291.2	Unknown	0.1	5	Irregular, elongate
BSSE-333D	quartz	34	-1.8	3.06404	273.3	Unknown	0.1	3	Very irregular, elongate
BSSE-333D	quartz	34	-1.3	2.24053	277.3	Unknown	0.1	6	Very irregular, elongate
BSSE-333D	quartz	34	-1.5	2.57243	219	Unknown	0.1	4	Irregular, equant
BSSE-333D	quartz	34	-3.3	5.41268	171.9	Unknown	0.1	6	Very irregular, elongate
Assemblage Mean			-2.1	3.52573	246.54		0.1	4.8
